# Supplementary material
Source: publisher figshare collection journal article supplement (https://plos.figshare.com/articles/dataset/_/5316280)
Supplement: Supplementary file [file 1]

### S3 Appendix: stability analysis of skyhook and balance control strategies.

This appendix presents the stability analysis for the proposed semi-active controllers. Considering the system dynamics Eq. (13), which takes into account the control input saturation

$$\ddot{x}_p = k(x_h - x_p) + (b_{control} + c)(\dot{x}_h - \dot{x}_p) \quad (S3.1)$$

$b_{control}$  is the damping from the semi-active control command. The semi-active control laws of the skyhook and balance are defined in Eq. (5) and Eq. (3), respectively.

$$b_{sky}(\dot{x}_p, M) = b_1(M) + b_2(M) \frac{\dot{x}_p}{\dot{x}_p - \dot{x}_h} \quad (S3.2)$$

$$b_{bal}(\dot{x}_p, M) = b_d(M) + (k_d(M) - k(M)) \frac{x_p - x_h}{\dot{x}_p - \dot{x}_h} \quad (S3.3)$$

The control command  $b_{control}$  is obtained using the following saturation due to physical limitations and  $b(\dot{x}_p, M)$  from one of the control laws presented in Eq. (2) and Eq. (3).

$$b_{control} = \begin{cases} b_{max}, & b(\dot{x}_p, M) \geq b_{max} \\ b_{control}, & b_{max} > b(\dot{x}_p, M) > 0 \\ 0, & 0 \geq b(\dot{x}_p, M) \end{cases} \quad (S3.4)$$

The presented stability proof only considers the boundary values of  $b_{control}$ . Thus both control strategies have the same proof as well as same boundary values.

Let  $w = kx_h + (c + b_{control})\dot{x}_h$ , then

$$\ddot{x}_p = -\frac{k}{m}x_p - \frac{b_{control} + c}{m}\dot{x}_p + \frac{1}{m}w. \quad (S3.5)$$

The Lyapunov candidate function is defined as

$$V = \mathbf{X}^T \mathbf{P} \mathbf{X} \quad (S3.6)$$

where  $X$  is the state variables and  $P$  is a positive matrix

$$\mathbf{X} = \begin{Bmatrix} x_p \\ \dot{x}_p \end{Bmatrix} \quad \mathbf{P} = \begin{bmatrix} \frac{k}{m}(c + b_{max} + m) & 1 \\ 1 & (c + b_{max} + m) \end{bmatrix} \quad (S3.7)$$

For the matrix  $P$  be positive definite, the determinant of the matrix  $P$  must be greater than zero,  $\det(P) > 0$ . The determinant of  $P$  is

$$\det(P) = k \left( 2b_{max} + 2c + m + \frac{(b_{max} + c)^2}{m} \right) - 1 > 0 \quad (\text{S3.8})$$

The heave compensator has  $k \gg 1$ ,  $b_{max} \gg 1$ ,  $c \gg 1$ . Thus, the determinant of  $P$  is always bigger than 0 and  $P$  is a positive definite matrix. Now, the derivative of  $V$  is obtained

$$\begin{aligned} \dot{V} = & +2\frac{1}{m}w(x_p + (c + b_{max} + m)\dot{x}_p) - 2\frac{k}{m}x_p^2 - 2x_p\dot{x}_p\frac{(c+b_{control})}{m} \\ & - 2\dot{x}_p^2 \left( (c + b_{max} + m)\frac{(c+b_{control})}{m} - 1 \right) \end{aligned} \quad (\text{S3.9})$$

Defining the matrix  $L$

$$\mathbf{L} = \begin{bmatrix} 2\frac{k}{m} & \frac{c+b_{control}}{m} \\ \frac{c+b_{control}}{m} & 2 \left[ \frac{(c+b_{control})(b_{max}+c+m)}{m} - 1 \right] \end{bmatrix} \quad (\text{S3.10})$$

The determinant of  $L$  has the below expression, which is always positive, because  $c > 1$  and  $b_{max} > b_{control} > 0$ . Thus  $L$  is positive definite.

$$\det(\mathbf{L}) = \frac{(c + b_{control} - 1)\frac{4k}{m}}{+ \frac{c+b_{control}}{m^2} (4k(c + b_{max}) - (c + b_{control}))} > 0 \quad (\text{S3.11})$$

The positive matrix  $L$  is used to rewrite the Eq. (??)

$$\dot{V} = -\mathbf{X}^T \mathbf{L} \mathbf{X} + 2\frac{1}{m}w(x_p + (c + b_{max} + m)\dot{x}_p) \quad (\text{S3.12})$$

When  $x_h$ ,  $\dot{x}_h$  and  $b_{control}$  are bounded,  $w$  is also bounded,  $\|w\| \leq w_0$ . We write  $x_p + (c + b_{max} + m)\dot{x}_p$  as  $YX$ , where  $Y = [1, (c + b_{max} + m)]$  and use the inequality  $YX \leq \|X\| \|Y\|$ . The norm of  $Y$  is constant. Using the last two inequalities we obtain:

$$\dot{V} \leq -\mathbf{X}^T \mathbf{L} \mathbf{X} + \frac{2}{m} \|Y\| \|X\| w_0 \quad (\text{S3.13})$$

The variables  $\lambda_{min}$  and  $\lambda_{max}$  denote the smallest and the largest eigenvalues of a matrix, respectively.

$$\dot{V} \leq -\lambda_{min}(L) \|X\|^2 + \frac{2}{m} \|Y\| w_0 \|X\| \quad (\text{S3.14})$$

A part of  $-\lambda_{min}(L) \|X\|^2$  dominates  $\frac{2}{m} \|Y\| w_0 \|X\|$  for large  $\|X\|$ . The inequality is rewritten as

$$\dot{V} \leq -(1 - \theta)\lambda_{min}(L) \|X\|^2 - \theta\lambda_{min}(L) \|X\|^2 + \frac{2}{m} \|Y\| w_0 \|X\| \quad (\text{S3.15})$$

where  $0 < \theta < 1$ . Then,

$$\dot{V} \leq -(1 - \theta)\lambda_{min}(L) \|X\|^2, \quad \forall \|X\| \geq \frac{2}{m} \|Y\| w_0 \frac{1}{\theta\lambda_{min}(L)} \quad (\text{S3.16})$$

We conclude that the solutions are globally uniformly ultimately bounded  $B$ . The theorem 4.18 of [?] is applied to determine the ultimate bound:

$$B = \frac{2}{m} \|Y\| w_0 \frac{1}{\theta\lambda_{min}(L)} \sqrt{\frac{\lambda_{max}(P)}{\lambda_{min}(P)}} \quad (\text{S3.17})$$

## References

- [1] Khalil H. Nonlinear Systems. 2002.
